# Supplementary material
Source: publisher figshare collection journal article supplement (https://acs.figshare.com/ndownloader/files/3962014)
Supplement: Supplementary file 1 [file 3962014]

## SUPPORTING INFORMATION

### Thiol-ene mediated neoglycosylation of collagen patches: a preliminary study

Laura Russo,<sup>†</sup> Chiara Battocchio,<sup>‡</sup> Valeria Secchi,<sup>§</sup> Elena Magnano,<sup>§</sup> Silvia Nappini,<sup>§</sup> Francesca Taraballi,<sup>†,‡</sup> Luca Gabrielli,<sup>†</sup> Francesca Comelli,<sup>†</sup> Antonio Papagni,<sup>□</sup> Barbara Costa,<sup>†</sup> Giovanni Polzonetti,<sup>‡</sup> Francesco Nicotra,<sup>†</sup> Antonino Natalello,<sup>†</sup> Silvia M. Doglia,<sup>†</sup> and Laura Cipolla<sup>\*†</sup>

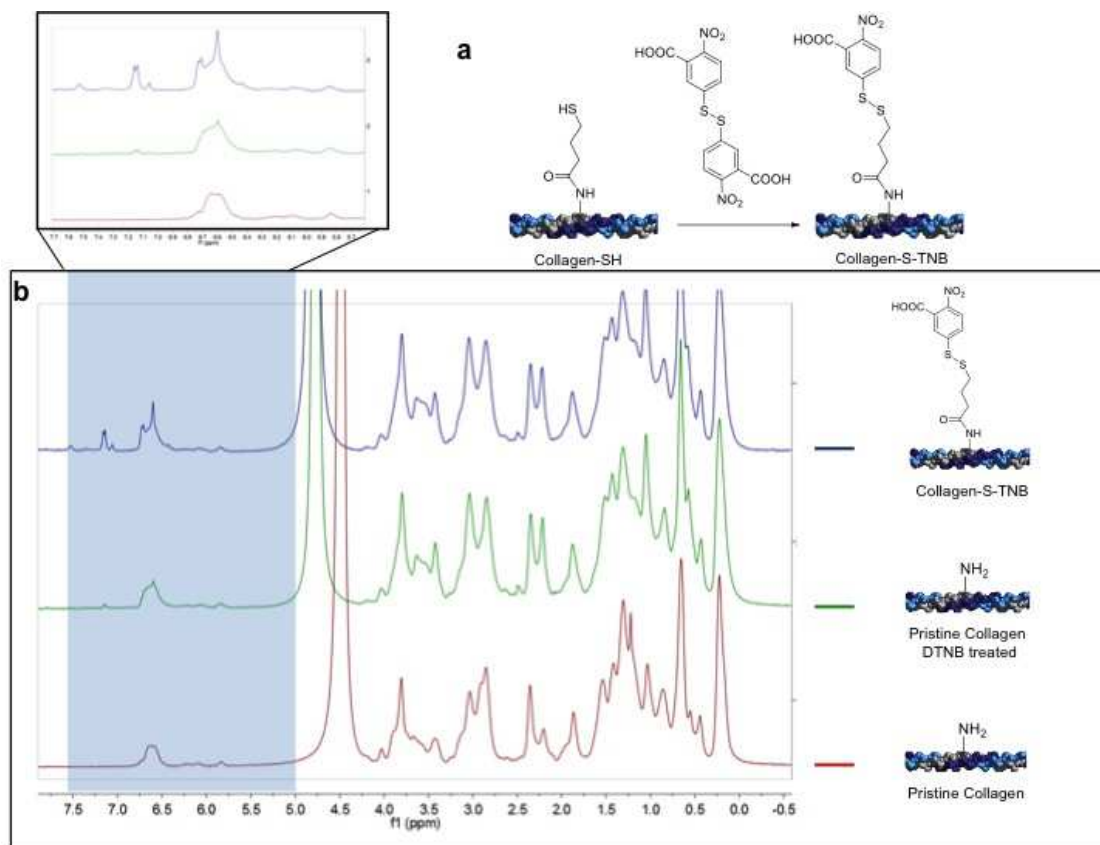

**Figure S1.** Full NMR spectra of the samples.

DTNB treatment was performed before and after the thiol-ene reaction; the spectra indicate the absence of additional aromatics due to TNB in the spectra of non thiolated collagen, and collagen after thiol-ene reaction (by peak integrals), demonstrating that the thiol-ene reaction is complete on thiol groups.

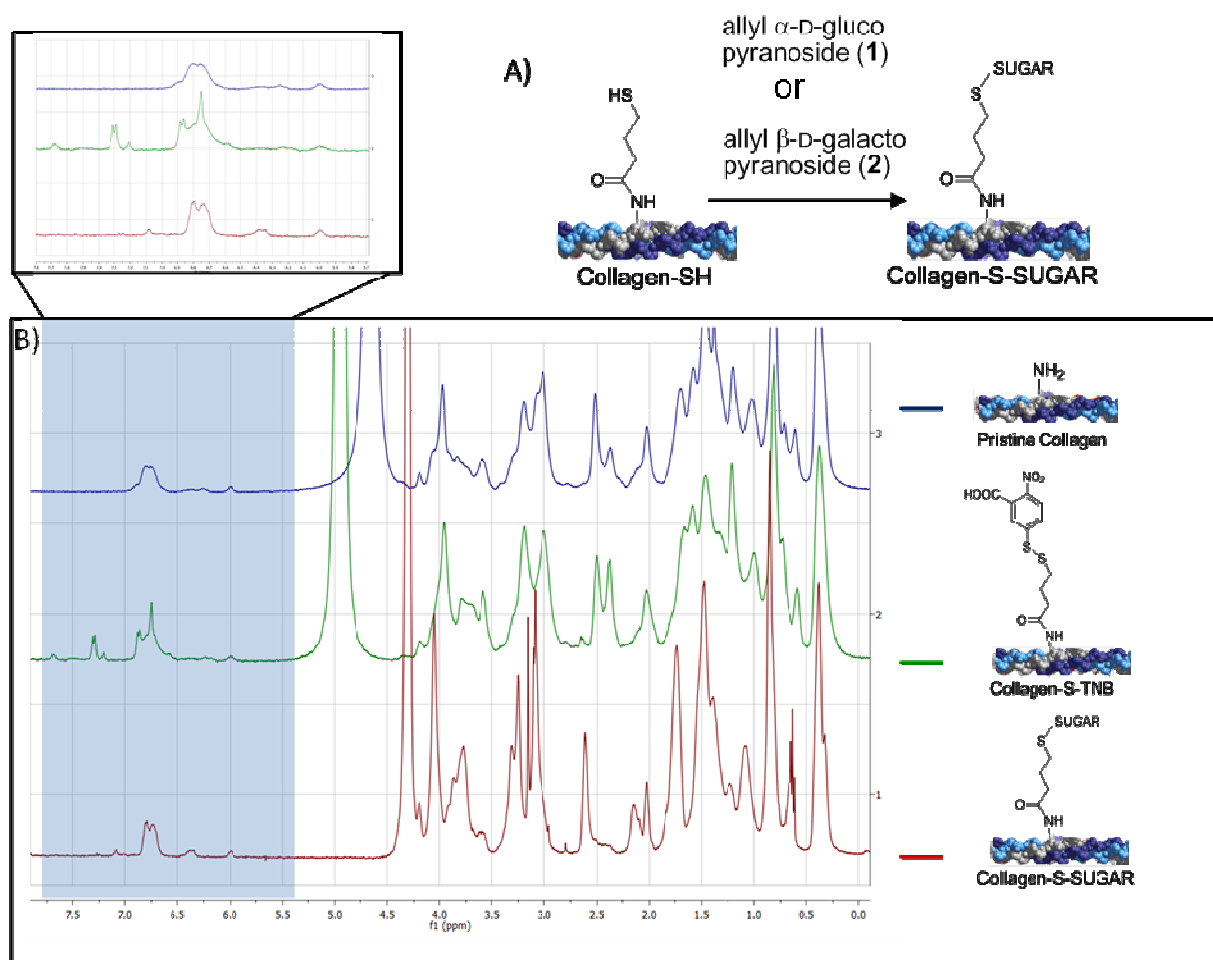

**Figure S2.** NMR spectra of collagen patches before and after the thiol-ene mediated neoglycosylation reaction.

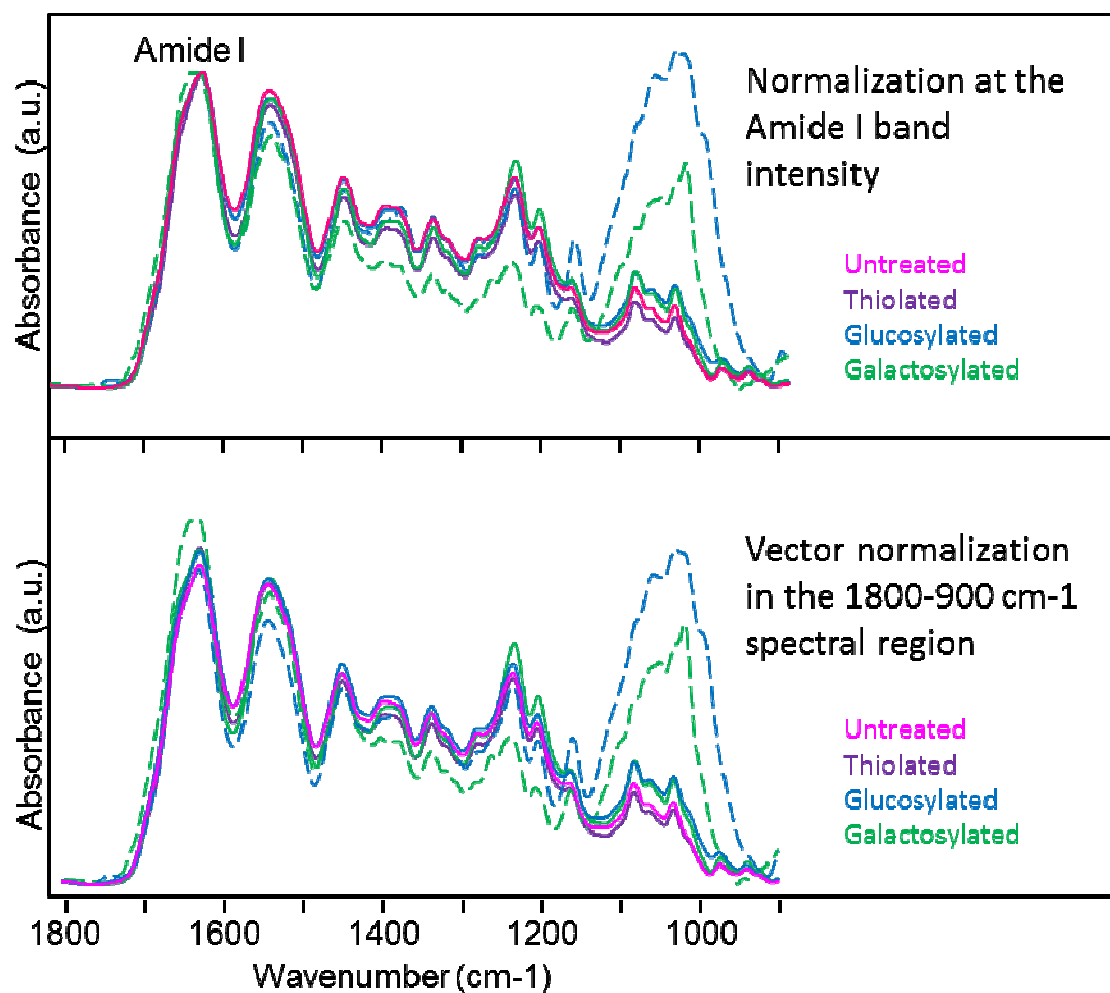

**Figure S3.** ATR-FTIR spectra of collagen samples reported after normalization at the Amide I band intensity (upper panel) and after vector normalization in the 1800-900 cm<sup>-1</sup> spectral region (bottompanel).

**Table S1.** Full SR-XPS data

| sample                                                | signal             | BE (eV)                              | FWHM (eV)                    | I <sub>ratio</sub> (%)         | I <sub>ratio</sub><br>Relative | assignments                                                                            |
|-------------------------------------------------------|--------------------|--------------------------------------|------------------------------|--------------------------------|--------------------------------|----------------------------------------------------------------------------------------|
| <b><i>Thiolated collagen</i></b>                      |                    |                                      |                              |                                |                                |                                                                                        |
|                                                       | C1s                | 285.00<br>286.35<br>287.82<br>289.00 | 1.34<br>1.34<br>1.34<br>1.34 | 80.0%<br>13.0%<br>4.8%<br>2.0% | 33.8<br>5.4<br>2.0<br>1.0      | C-C<br>C-N, C-S<br>C-OH<br>O-C=O (collagen)                                            |
|                                                       | N1s                | 399.10<br>401.31                     | 2.07<br>2.07                 | 75.0%<br>25.0%                 | 3.0<br>1.0                     | R-NH <sub>2</sub> ; R-NH-R'<br>RNH <sub>2</sub> <sup>+</sup> ; amide-like R-NH-C(O)-R' |
|                                                       | S2p <sub>3/2</sub> | 162.26                               | 1.95                         | 100%                           |                                | S thiol (-CH <sub>2</sub> -S-CH <sub>2</sub> -)                                        |
|                                                       | O1s                | 532.19<br>533.68                     | 2.36<br>2.36                 | 83.6%<br>16.4%                 | 4.0<br>1.0                     | R-C=O; O-C=O*<br>C-OH; O*-C=O                                                          |
| <b><i>Glycosilated collagen (glucopyranose)</i></b>   |                    |                                      |                              |                                |                                |                                                                                        |
|                                                       | C1s                | 285.00<br>286.18<br>287.50<br>288.90 | 1.34<br>1.34<br>1.34<br>1.34 | 79.5%<br>14.3%<br>4.8%<br>1.4% | 57.3<br>10.3<br>3.5<br>1.0     | C-C<br>C-N, C-S<br>C-OH<br>O-C=O (collagen)                                            |
|                                                       | N1s                | 399.05<br>400.61                     | 1.55<br>1.55                 | 67.0%<br>33.0%                 | 2.0<br>1                       | R-NH <sub>2</sub> ; R-NH-R'<br>RNH <sub>2</sub> <sup>+</sup> ; amide-like R-NH-C(O)-R' |
|                                                       | S2p <sub>3/2</sub> | 162.47                               | 1.75                         | 100%                           |                                | S thiol (-CH <sub>2</sub> -S-CH <sub>2</sub> -)                                        |
|                                                       | O1s                | 532.24<br>533.52                     | 2.35<br>2.35                 | 71.3%<br>28.7%                 | 2.5<br>1                       | R-C=O; O-C=O*<br>C-OH; O*-C=O                                                          |
| <b><i>Glycosylated collagen (galactopyranose)</i></b> |                    |                                      |                              |                                |                                |                                                                                        |
|                                                       | C1s                | 285.00<br>286.29<br>287.69<br>288.75 | 1.33<br>1.33<br>1.33<br>1.33 | 81.8%<br>11.2%<br>5.2%<br>1.8% | 45.4<br>6.2<br>3.0<br>1.0      | C-C<br>C-N, C-S<br>C-OH<br>O-C=O (collagen)                                            |
|                                                       | N1s                | 399.16<br>400.89                     | 2.07<br>2.07                 | 75.3%<br>24.7%                 | 3.0<br>1                       | R-NH <sub>2</sub> ; R-NH-R'<br>RNH <sub>2</sub> <sup>+</sup> ; amide-like R-NH-C(O)-R' |
|                                                       | S2p <sub>3/2</sub> | 162.39                               | 2.22                         | 100%                           |                                | S thiol (-CH <sub>2</sub> -S-CH <sub>2</sub> -)                                        |
|                                                       | O1s                | 532.27<br>533.68                     | 2.08<br>2.08                 | 67.0%<br>33.0%                 | 2.0<br>1                       | R-C=O; O-C=O*<br>C-OH; O*-C=O                                                          |
